# Supplementary material
Source: publisher site journal article supplement (https://www.dovepress.com/article/320611)
Supplement: Supplementary file 1 [file get_supplementary_file.php]

**Supplementary data**

**Impact of lurasidone and other antipsychotics on body weight: real-world, retrospective, comparative study of 15,323 adults with schizophrenia**

**Authors:**

Ilena Pochiero, Fabrizio Calisti, Alessandro Comandini, Alessandra Del Vecchio, Isabella Costamagna, Maria Teresa Rosignoli, Agnese Cattaneo, Sasikiran Nunna , Ilaria Peduto, Franca Heiman, Hsiu-Ching Chang, Chi-Chang Chen, Christoph U Correll

**Table S1.** Multivariate Cox proportional hazards model analysis of the risk of worsening of BMI category.

| Parameter | HR (95% CI) | *p*-valuea |
| --- | --- | --- |
| Antipsychotic |  |  |
| Lurasidone (**REF**) |  |  |
| Aripiprazole (SGA) | 1.487 (1.069; 2.067) | **0.0183** |
| Ziprasidone (SGA) | 1.282 (0.848; 1.937) | 0.2386 |
| Haloperidol (FGA) | 1.371 (0.937; 2.006) | 0.1037 |
| Olanzapine (SGA) | 1.643 (1.186; 2.276) | **0.0028** |
| Quetiapine (SGA) | 1.452 (1.053; 2.002) | **0.0230** |
| Risperidone (SGA) | 1.279 (0.926; 1.766) | 0.0183 |
| Duration of index antipsychotic | 0.999 (0.998; 1.000) | **0.0130** |
| Index year |  |  |
| 2013 (**REF**) |  |  |
| 2014 | 1.045 (0.827; 1.320) | 0.7148 |
| 2015 | 0.999 (0.784; 1.273) | 0.9952 |
| 2016 | 1.033 (0.799; 1.335) | 0.8040 |
| 2017 | 1.205 (0.926; 1.569) | 0.1655 |
| 2018 | 1.302 (0.991; 1.709) | 0.0580 |
| 2019 | 1.385 (0.854; 2.245) | 0.1869 |
| Sex |  |  |
| Female (**REF**) |  |  |
| Male | 0.876 (0.764; 1.005) | 0.0585 |
| Age group category, years |  |  |
| 18–34 (**REF**) |  |  |
| 35–44 | 0.703 (0.574; 0.861) | **0.0007** |
| 45–54 | 0.617 (0.507; 0.750) | **<.0001** |
| 55–64 | 0.498 (0.405; 0.614) | **<.0001** |
| 65–74 | 0.542 (0.415; 0.708) | **<.0001** |
| ≥75 | 0.275 (0.169; 0.445) | **<.0001** |
| Region of residence |  |  |
| Northeast (**REF**) |  |  |
| Midwest | 0.985 (0.805; 1.205) | 0.8816 |
| South | 1.054 (0.880; 1.263) | 0.5689 |
| West | 0.92 (0.739; 1.147) | 0.4592 |
| Race/ethnicity |  |  |
| Caucasian (**REF**) |  |  |
| African American | 1.008 (0.846; 1.200) | 0.9294 |
| Asian | 0.735 (0.402; 1.343) | 0.3160 |
| Hispanic | 0.634 (0.327; 1.230) | 0.1776 |
| Others/unknown | 1.103 (0.921; 1.321) | 0.2878 |
| Comorbidity |  |  |
| Major depressive disorder | 1.082 (0.901; 1.299) | 0.3991 |
| Anxiety disorders | 1.043 (0.883; 1.231) | 0.6213 |
| Substance abuse | 1.008 (0.875; 1.160) | 0.9154 |
| Hypertension | 1.024 (0.862; 1.217) | 0.7877 |
| Hyperlipidaemia | 0.960 (0.806; 1.143) | 0.6475 |
| Diabetes (type 1 or 2) | 0.792 (0.642; 0.978) | **0.0303** |
| Hyperprolactinaemia | 1.546 (0.689; 3.471) | 0.2905 |
| Insomnia | 0.876 (0.683, 1.123) | 0.2975 |
| BMI at index date or within 1 month before index date | 0.959 (0.950; 0.969) | **<.0001** |

aValues in bold indicate parameters with significantly increased risk of worsening BMI category.

BMI, body mass index; CI, confidence interval; FGA, first-generation antipsychotic; HR, hazard ratio; REF, reference; SGA, second-generation antipsychotic.

**Table S2** Multivariate Cox proportional hazards model analysis of the risk of improving BMI category.

| Parameter | HR (95% CI) | *p*-valuea |
| --- | --- | --- |
| Antipsychotic |  |  |
| Lurasidone (**REF**) |  |  |
| Aripiprazole (SGA) | 0.783 (0.637; 0.962) | **0.0197** |
| Ziprasidone (SGA) | 0.878 (0.684; 1.126) | 0.3048 |
| Haloperidol (FGA) | 0.796 (0.627; 1.010) | 0.0603 |
| Olanzapine (SGA) | 0.819 (0.666; 1.007) | 0.0578 |
| Quetiapine (SGA) | 0.836 (0.687; 1.016) | 0.0715 |
| Risperidone (SGA) | 0.881 (0.727; 1.067) | 0.1950 |
| Duration of index antipsychotic | 1.000 (1.000; 1.001) | 0.5629 |
| Index year |  |  |
| 2013 (**REF**) |  |  |
| 2014 | 0.933 (0.796; 1.094) | 0.3935 |
| 2015 | 0.997 (0.848; 1.173) | 0.9734 |
| 2016 | 0.914 (0.765; 1.092) | 0.3231 |
| 2017 | 0.929 (0.769; 1.124) | 0.4491 |
| 2018 | 0.991 (0.812; 1.210) | 0.9314 |
| 2019 | 2.282 (1.626; 3.203) | **<.0001** |
| Sex |  |  |
| Female (**REF**) |  |  |
| Male | 1.054 (0.956; 1.163) | 0.2928 |
| Age group category, years |  |  |
| 18–34 (**REF**) |  |  |
| 35–44 | 1.021 (0.866; 1.204) | 0.8020 |
| 45–54 | 1.115 (0.957; 1.299) | 0.1641 |
| 55–64 | 1.126 (0.963; 1.316) | 0.1371 |
| 65–74 | 1.228 (1.012; 1.490) | **0.0377** |
| ≥75 | 1.438 (1.119; 1.848) | **0.0046** |
| Region of residence |  |  |
| Northeast (**REF**) |  |  |
| Midwest | 1.034 (0.895; 1.195) | 0.6513 |
| South | 1.107 (0.973; 1.261) | 0.1228 |
| West | 1.027 (0.876; 1.204) | 0.7426 |
| Race/ethnicity |  |  |
| Caucasian (**REF**) |  |  |
| African American | 1.119 (0.992; 1.263) | 0.068 |
| Asian | 1.368 (0.952; 1.966) | 0.0901 |
| Hispanic | 0.809 (0.518; 1.262) | 0.3498 |
| Others/unknown | 1.024 (0.894; 1.173) | 0.7328 |
| Comorbidity |  |  |
| Major depressive disorder | 1.069 (0.938; 1.217) | 0.3176 |
| Anxiety disorders | 0.996 (0.882; 1.125) | 0.9509 |
| Substance abuse | 1.168 (1.058; 1.290) | **0.0022** |
| Hypertension | 1.003 (0.896; 1.122) | 0.9621 |
| Hyperlipidaemia | 1.028 (0.919; 1.151) | 0.6298 |
| Diabetes (type 1 or 2) | 1.090 (0.967; 1.230) | 0.1593 |
| Hyperprolactinaemia | 0.924 (0.439; 1.947) | 0.8361 |
| Insomnia | 0.932 (0.784; 1.108) | 0.4233 |
| BMI at index date or within 1 month before index date | 1.030 (1.023; 1.037) | **<.0001** |

aValues in bold indicate parameters with significantly increased risk of improving BMI category.

BMI, body mass index; CI, confidence interval; FGA, first-generation antipsychotic; HR, hazard ratio; REF, reference; SGA, second-generation antipsychotic.
